# Supplementary material for: Classifying development stages of primeval European beech forests: is clustering a useful tool?
Source: PubMed Central journal article supplement (PMC6247681; doi:10.1186/s12898-018-0203-y), 2018-11-20
Supplement: 12898_2018_203_MOESM2_ESM.pdf [file 12898_2018_203_MOESM2_ESM.pdf]

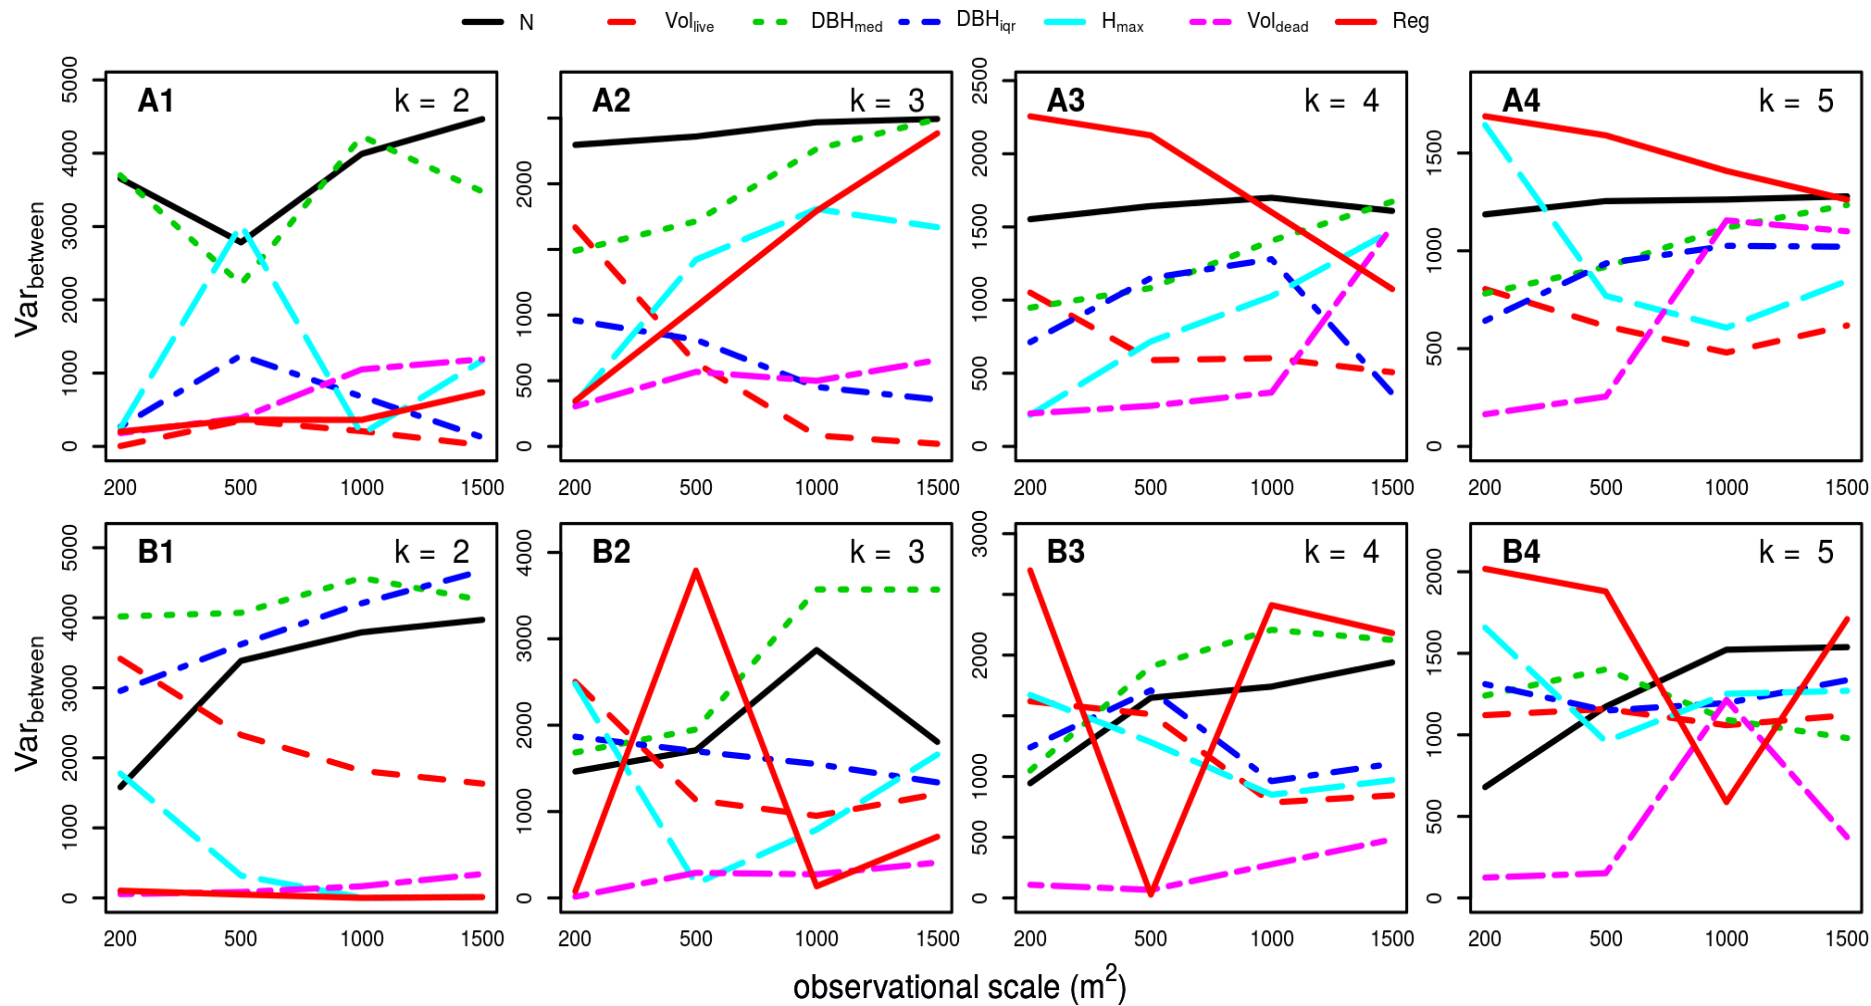

Figure S2\*: Between-clusters variance of stand structural data (7 attributes, abbreviations see Table 2) of the primeval beech forests Mirdita (A1 – A4) and Rajca (B1 – B4). K-means clustering was used to detect clusters (2 to 5 clusters, panels 1 to 4). A moving window approach with a bivariate normal kernel was applied (weighting of objects by their distance to the window center).
