# Supplementary material for: Classifying development stages of primeval European beech forests: is clustering a useful tool?
Source: PubMed Central journal article supplement (PMC6247681; doi:10.1186/s12898-018-0203-y), 2018-11-20
Supplement: 12898_2018_203_MOESM3_ESM.pdf [file 12898_2018_203_MOESM3_ESM.pdf]

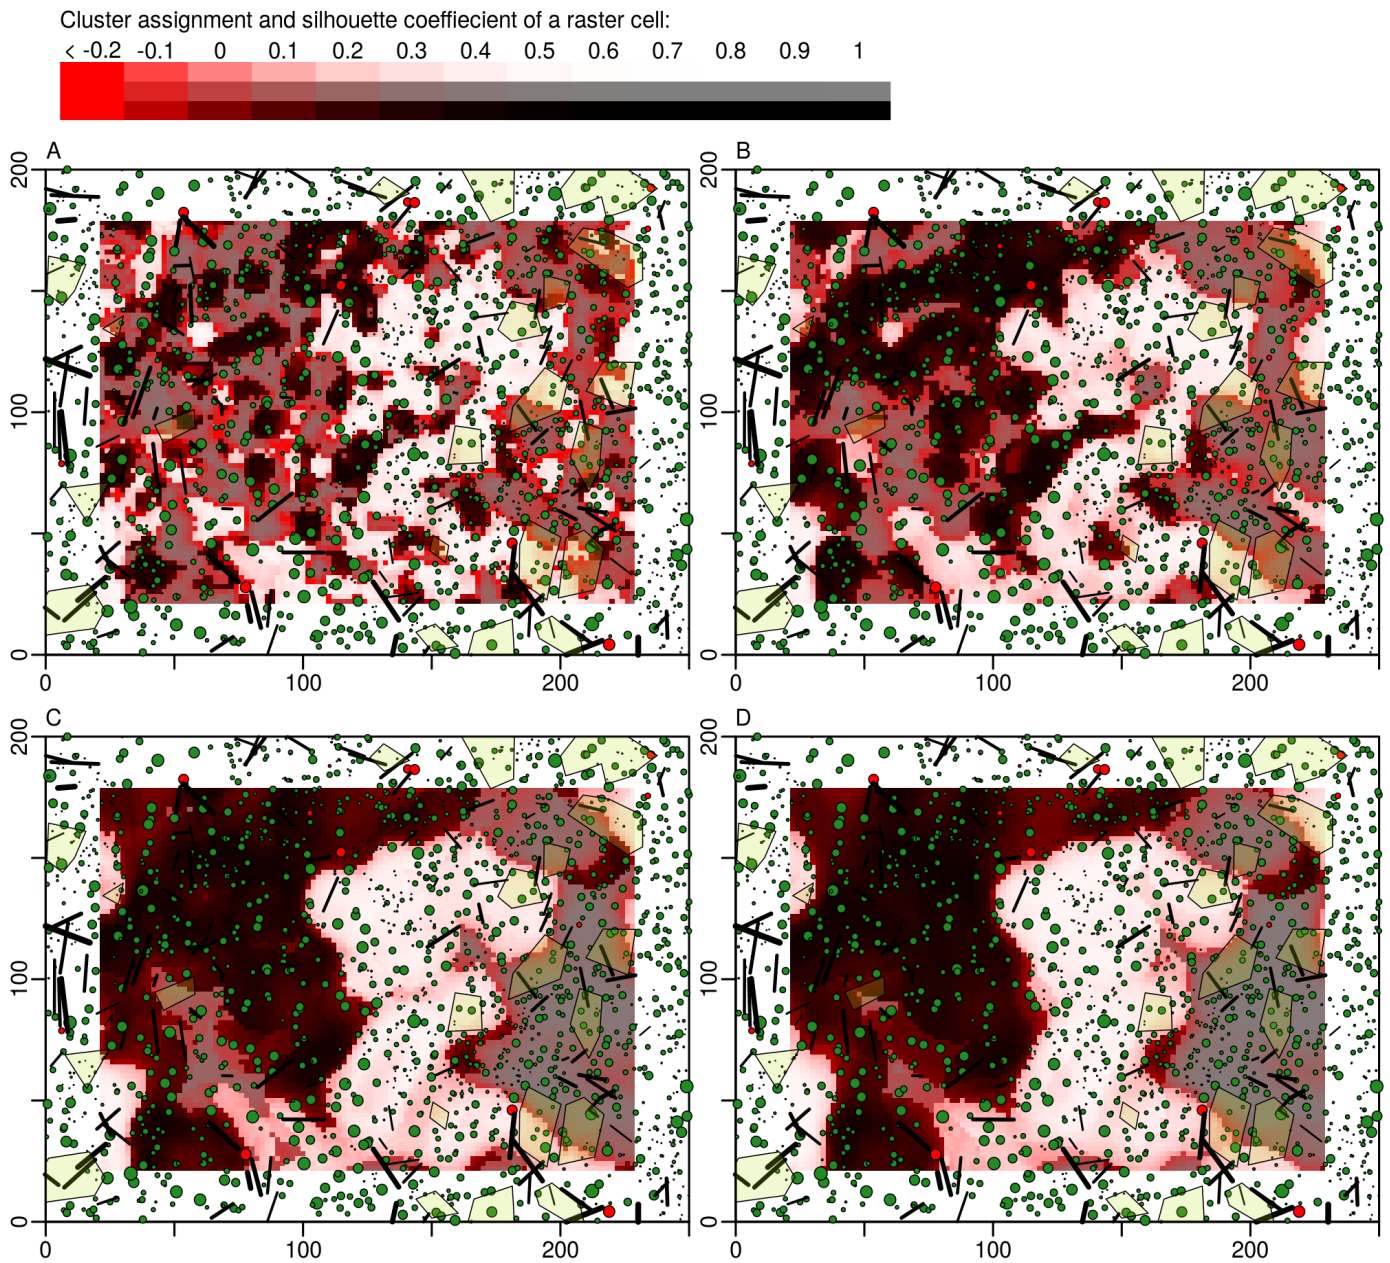

Figure S3\*: Stem position maps of the primeval forest Mirdita with k-means clustering solutions of the structural data highlighted (3 clusters). Coloring of the background images indicates areas which were assigned to the same cluster (gray tone) and how well a point is represented by its cluster (silhouette coefficient, red tone). A moving window approach of several observation scales (200 m<sup>2</sup>, 500 m<sup>2</sup>, 1000 m<sup>2</sup>, 1500 m<sup>2</sup>, panels A to D) was applied to aggregate the structural datasets (7 attributes, Table 2).
