# Supplementary material for: Classifying development stages of primeval European beech forests: is clustering a useful tool?
Source: PubMed Central journal article supplement (PMC6247681; doi:10.1186/s12898-018-0203-y), 2018-11-20
Supplement: 12898_2018_203_MOESM4_ESM.pdf [file 12898_2018_203_MOESM4_ESM.pdf]

Cluster assignment and silhouette coefficient of a raster cell:

< -0.2 -0.1 0 0.1 0.2 0.3 0.4 0.5 0.6 0.7 0.8 0.9 1

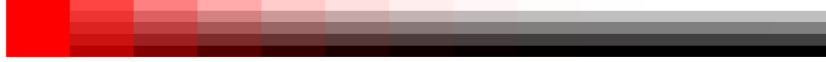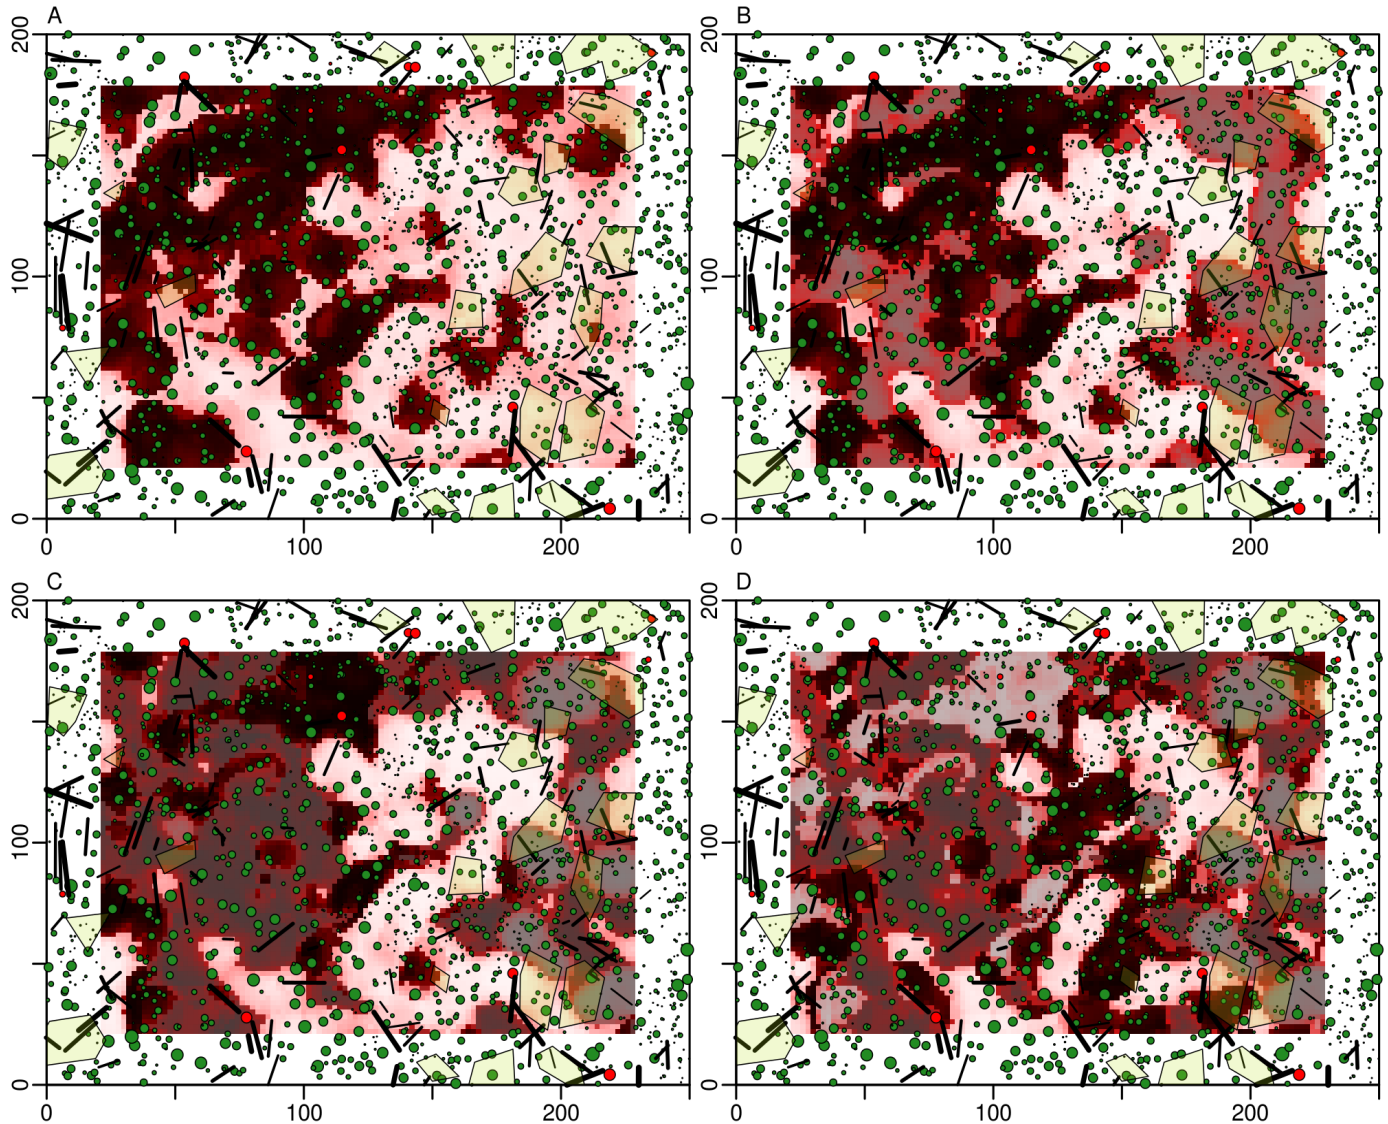

**Figure S4\*:** Stem position maps with k-means clustering solutions of the structural data highlighted (2 to 5 clusters, panels A to D). Coloring of the background images indicates areas which were assigned to the same cluster (gray tone) and how well a point is represented by its cluster (silhouette coefficient, red tone). A moving window of an observation scale of 500 m<sup>2</sup> was used to aggregate the structural datasets (7 attributes, Table 2). A bivariate normal kernel was applied (weighting of objects by their distance to the window center).
